# Supplementary material
Source: PubMed Central journal article supplement (PMC10241283)
Supplement: EIJ-D-22-00305_Rader_SD.pdf [file EIJ-D-22-00305_Rader_SD.pdf]

## Supplementary data

**Supplementary Table 1. Baseline characteristics of all RADIANCE-HTN SOLO patients randomised to uRDN**

| Clinical characteristics                                      | uRDN                   |
|---------------------------------------------------------------|------------------------|
| Age (years)                                                   | 54.4 ± 10.2            |
| Female sex (%)                                                | 38% (28/74)            |
| Race                                                          |                        |
| White                                                         | 81% (60/74)            |
| Black                                                         | 16% (12/74)            |
| Other                                                         | 3% (2/74)              |
| Body mass index (kg/m <sup>2</sup> )                          | 29.9 ± 5.9             |
| Abdominal obesity                                             | 56% (41/74)            |
| eGFR – ml/min/1.73m                                           | 84.7 ± 16.2            |
| eGFR <60 ml/min/1.73m                                         | 1% (1/24)              |
| Type 2 diabetes                                               | 3% (2/74)              |
| Sleep apnoea                                                  | 8% (6/74)              |
| <b>Screening Blood Pressure (before anti-HTN med washout)</b> |                        |
| Office BP (mmHg)                                              | 142.6/92.3 ± 14.7/10.1 |
| <b>Baseline Blood Pressures (after anti-HTN med washout)</b>  |                        |
| Office BP (mmHg)                                              | 154.5/99.7 ± 12.4/7.7  |
| Daytime ABP (mmHg)                                            | 150.3/93.1 ± 7.8/4.8   |
| 24-hour ABP (mmHg)                                            | 142.6/87.3 ± 8.1/5.0   |

**Supplementary Table 2. Number and type of antihypertensive medications at 36 months**

| <b>Antihypertensive medications</b>                              |               |
|------------------------------------------------------------------|---------------|
| Mean number of antihypertensive medications at 36M               | 1.3 ± 0.8     |
| Number of antihypertensive medications at 36M                    |               |
| 0                                                                | 17.6% (9/51)  |
| 1 medication                                                     | 43.1% (22/51) |
| 2 medications in combination                                     | 35.3% (18/51) |
| 3 medications in combination                                     | 3.9% (2/51)   |
| Types of Medication at 36M                                       |               |
| Renin Angiotensin System Blockers                                | 51.0% (26/51) |
| Angiotensin converting enzyme inhibitor                          | 25.5% (13/51) |
| Angiotensin receptor blocker                                     | 25.5% (13/51) |
| Direct renin inhibitor                                           | 0.0% (0/51)   |
| Calcium channel blocker                                          | 52.9% (27/51) |
| Thiazide-like diuretic                                           | 21.6% (11/51) |
| Aldosterone antagonist                                           | 0.0% (0/51)   |
| Alpha-1 receptor blocker                                         | 0.0% (0/51)   |
| Beta blocker                                                     | 0.0% (0/51)   |
| Centrally acting alpha-2 agonist or imidazoline receptor agonist | 0.0% (0/51)   |
| Vasodilator                                                      | 0.0% (0/51)   |

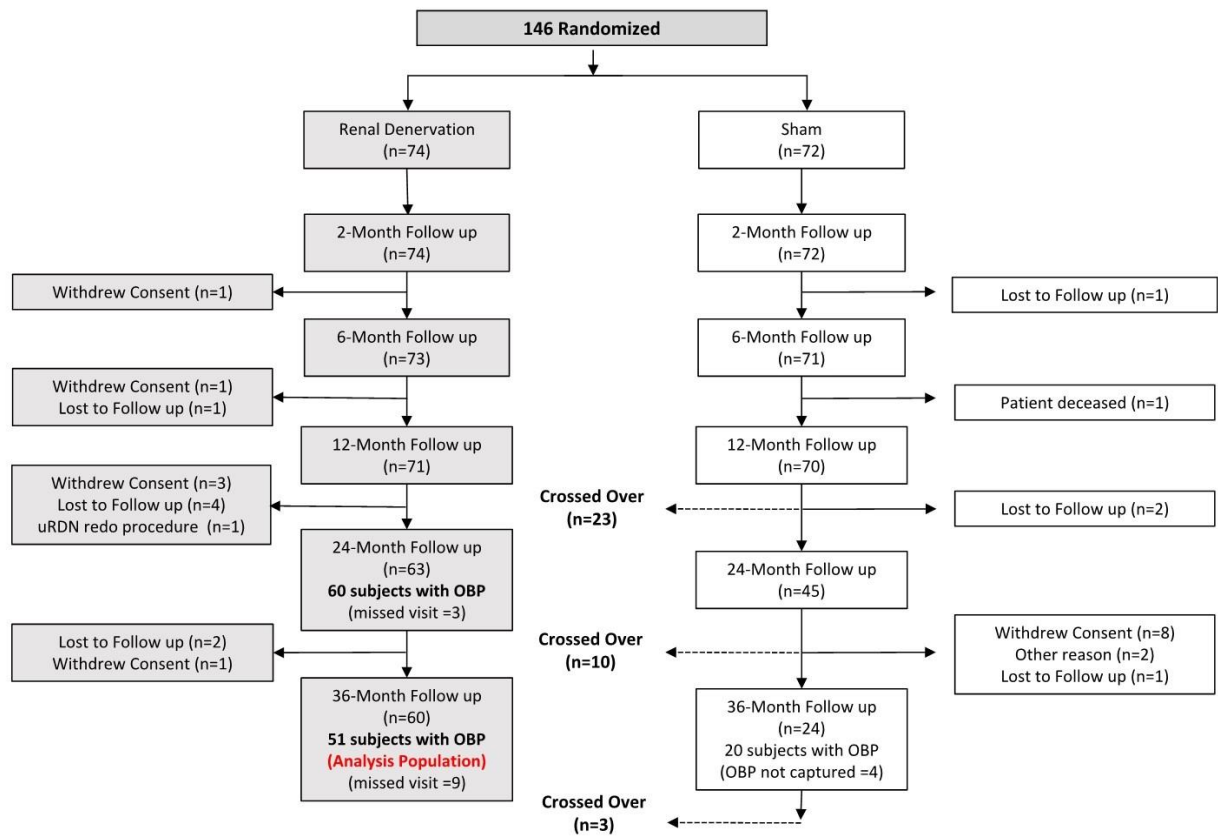

Supplementary Figure 1. Patient disposition

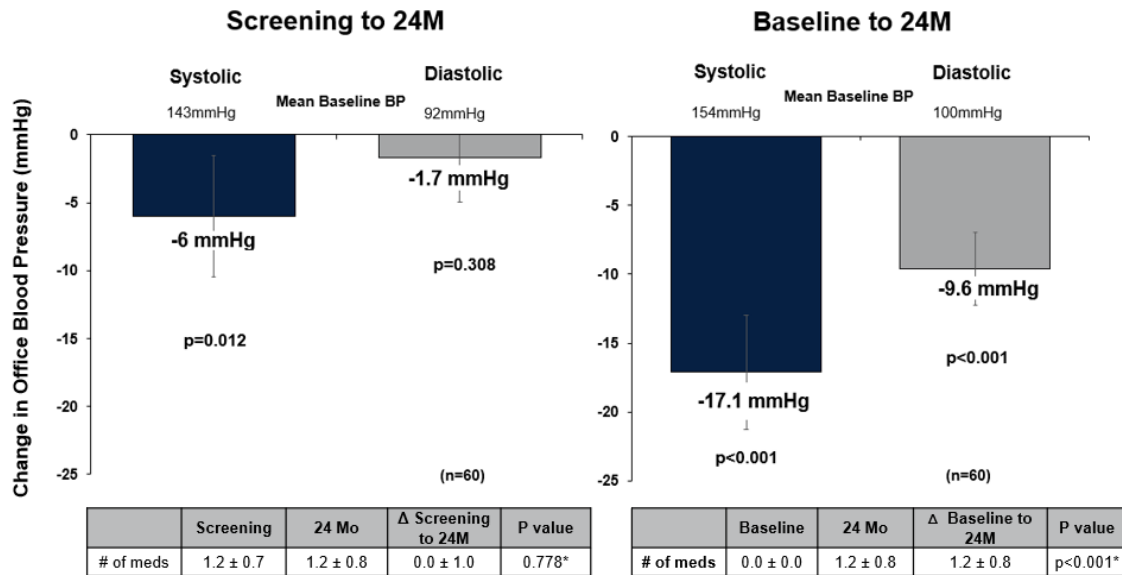

Values are presented as mean ± SD. Error bars represent 95% confidence interval. \*Wilcoxon signed-rank tests. Systolic office blood pressure change from baseline median -20.0 (-29.0, -7.5).

**Supplementary Figure 2. Office blood pressure changes for the 24-month population**
